# Supplementary material for: Enabling STD-NMR fragment screening using stabilized native GPCR: A case study of adenosine receptor
Source: PubMed Central journal article supplement (PMC5970182; doi:10.1038/s41598-018-26113-0), 2018-05-25
Supplement: 41598_2018_26113_MOESM1_ESM.pdf [file 41598_2018_26113_MOESM1_ESM.pdf]

**TITLE:** Enabling STD-NMR fragment screening using stabilized native GPCR:  
A case study of adenosine receptor

**AUTHORS:** Sébastien IGONET<sup>1\*</sup>, Claire RAINGEVAL<sup>3\*</sup>, Erika CECON<sup>5,6,7\*</sup>, Maja PUČIĆ-BAKOVIĆ<sup>2</sup>, Gordan LAUC<sup>2</sup>, Olivier CALA<sup>3</sup>, Maciej BARANOWSKI<sup>4</sup>, Javier PEREZ<sup>4</sup>, Ralf JOCKERS<sup>5,6,7</sup>, Isabelle KRIMM<sup>3</sup> & Anass JAWHARI<sup>1†</sup>

### **SUPPLEMENTARY INFORMATION**

**Figure S1. Functional expression of the full-length and wild type A<sub>2A</sub>R in *Pichia pastoris* (A) and in *Sf9* insect cells (B).** 3 clones of yeast were tested as indicated by #. Expression kinetic was performed after 21 and 69 hours for yeast and after 24, 48 and 72 hours for insect cells. The presence of A<sub>2A</sub>R was assessed by western blot using A<sub>2A</sub>R antibody. Radioligand binding on enriched internal (C and D) and plasma membranes fractions (E and F) from yeast (C and E) and *Sf9* (D and F). Membrane fractions were analyzed by SDS-PAGE and Western blot. ZM241385 was used as radioligand. K<sub>d</sub> were extrapolated from binding curves. 15K and 100K correspond to internal (15000G fractionation) and plasma membranes (100 000G fractionation), respectively. Full length original gels are presented in Figure S5.

**Table S2: N-glycan compositions of identified chromatographic peaks of A<sub>2A</sub>R (from *Sf9* or *pichia*) analyzed by mass spectrometry.**

**Figure S3: Characterization of A<sub>2A</sub>R glycans after purification from different enriched internal or plasma membranes from yeast or *Sf9*.** Solubilization and talon affinity purification from each membrane fraction. T, P, S, FT, W and E correspond to Total, Pellet, Solubilized, Flow through, Wash and Imidazole elution fractions, respectively (A). HILIC-UPLC N-glycome profiles of A<sub>2A</sub>R purified from *P. pastoris* plasma membrane (B), *P. pastoris* internal membranes (C), *Sf9* plasma membrane (D), and *Sf9* internal membranes (E). Structures are depicted following the CFG notation. GU – glucose units. Full length original gels are presented in Figure S5.

Obtained glycan profiles allowed differentiation of eight and fourteen highest intensity glycan peaks released from A<sub>2A</sub>R purified from membranes of *P. pastoris* and Sf9, respectively (**Figure S3B-E**). Preliminary structural assignment of glycan peaks was based on their elution properties, performed exoglycosidase digestions (data not shown). N-glycan compositions were confirmed via matrix-assisted laser desorption/ionization time-of-flight mass spectrometry (MALDI-TOF-MS) following initial chromatographic separation (**Table S2**). Glycan profiling revealed three main results. First, glycan profiles of A<sub>2A</sub>R purified from plasma and internal membranes of *P. pastoris* were highly similar, both in glycan compositions and their abundance (**Figure S3B-C**). Second, glycan profiles of A<sub>2A</sub>R purified from plasma and internal membranes of Sf9 also showed a high degree of similarity (**Figure S3D-E**). Third, glycan profiles of A<sub>2A</sub>R purified from *P. pastoris* and Sf9 showed some differences. All the glycans released from A<sub>2A</sub>R expressed in *P. pastoris* were oligomannose-type structures having seven to thirteen mannose residues (M7-13) with M9 being the most abundant. Similarly, oligomannose structures dominated the glycan profiles of A<sub>2A</sub>R expressed in Sf9 but had less mannose residues in their composition (M3-10) and the most abundant was monofucosylated trimannosidic glycan (FM3). In addition, complex-type glycans in which antennae initiated by N-Acetylglucosamine (GlcNAc) residues are attached to the mannose (Man) residues of the core sugar sequence common to all N-glycans (Man<sub>3</sub>GlcNAc<sub>2</sub>) were also present.

**Figure S4: Chemical structures of fragments hits for A<sub>2A</sub>R identified from hundred fragments using STD-NMR.** Fragments are classified into two groups: the first group contains the fragments used for the biological assay, the second groups contain the other fragment hits.

**Figure S5: Initial gels used to prepare Figures by cropping only lanes of interest.** A- Gel corresponding to Figure S3A. B- Gel corresponding to Figure 2B. C- Gel corresponding to Figure S1 C, D, E and F.

**Figure S6: Gel filtration profile of A<sub>2A</sub>R StaR2 (purified in DDM/CHS).** B- Gel filtration fractions were analyzed by SDS-PAGE revealed by stain free (total protein) or western blot (A<sub>2A</sub>R only).

**Figure S7: Chemical structures of fragments used in the STD experiments reported in Figure 4.** Fragments are classified into three groups: the first group contains the fragments displaying large STD signals (strong binders), the second group corresponds to fragments displaying weak STD signals (weak binders) and the third groups are non-binders.

**Figure S8: STD-NMR investigation of fragment 13 binding to A<sub>2A</sub>R.**

The 1D and STD NMR spectra for fragment 13 bound to A<sub>2A</sub>R are shown. Fragment 13 displays significant STD signals. The 1D and STD NMR spectra fragment 13 are shown in the presence of the CGS21680 agonist compound. NMR resonances of the CGS21680 compound are labelled with the letters CGS. The STD binding signal of fragment 13 is weaker in the presence of CGS21680.

**Table S9: Dissociation constant determined by radiobinding measurements for studied A<sub>2A</sub>R (membranes and purified proteins) samples.**

Figure S1

A

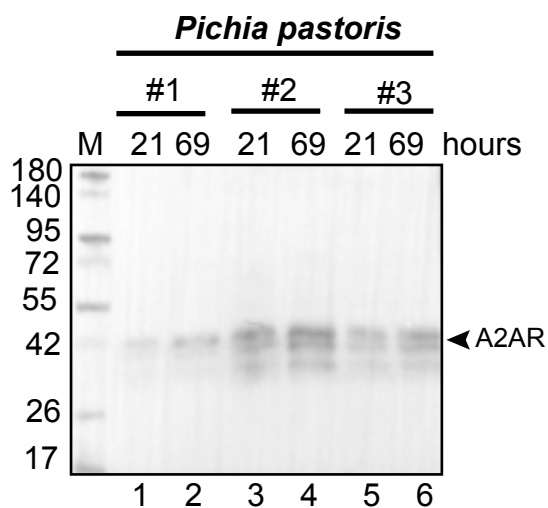

B

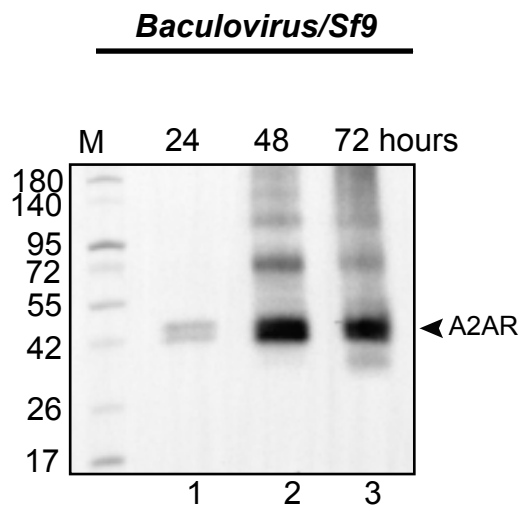

C

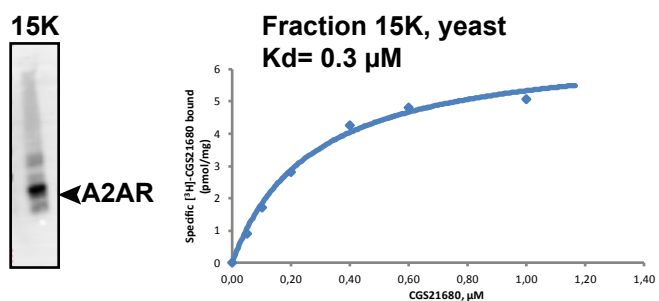

D

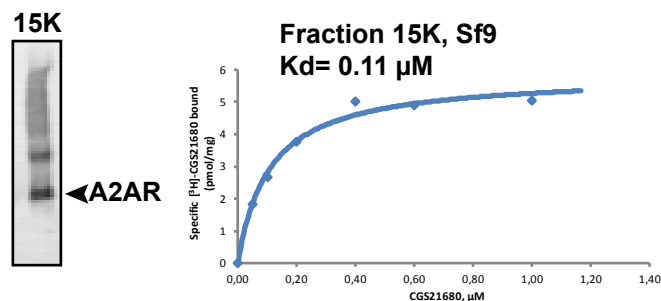

E

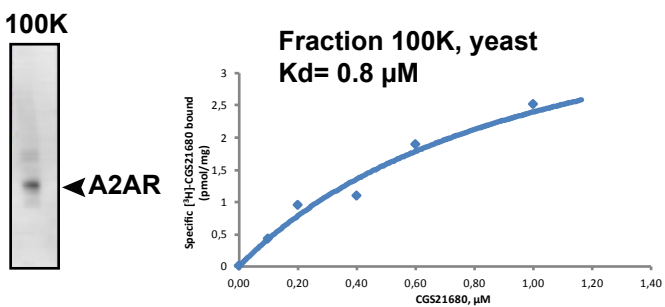

F

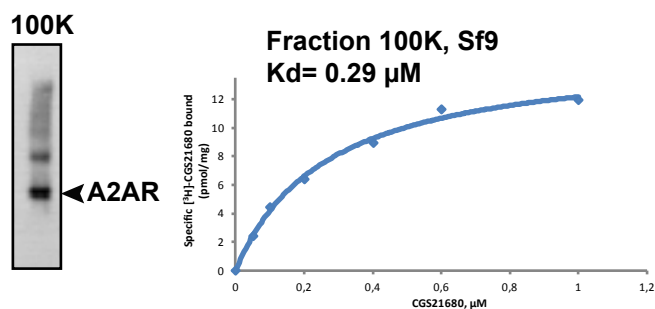

**Table S2: N-glycan compositions of identified chromatographic peaks of A2AR**

| Sf9 A2A protein |                         |                          |                        |                            |
|-----------------|-------------------------|--------------------------|------------------------|----------------------------|
| Fraction        | [M+Na] <sup>+</sup> m/z | Composition <sup>a</sup> | Structure <sup>b</sup> | Glycan scheme <sup>c</sup> |
| 1               | 1053.631                | H3N2                     | M3                     |                            |
| 2               | 1199.539                | H3N2F1                   | FM3                    |                            |
| 3               | 1402.684                | H3N3F1                   | FA1                    |                            |
| 4               | 1605.730                | H3N4F1                   | FA2                    |                            |
| 5               | 1377.639                | H5N2                     | M5                     |                            |
| 6               | 1767.838                | H4N4F1                   | FA2G1                  |                            |
| 7               | 1539.690                | H6N2                     | M6                     |                            |
| 8               | 1685.885                | H6N2F1                   | M6+F                   |                            |
| 9               | 1701.894                | H7N2                     | M7                     |                            |
| 10              | 1864.05                 | H8N2                     | M8                     |                            |
| 11              | 1864.041                | H8N2                     | M8                     |                            |
| 12              | 2025.891                | H9N2                     | M9                     |                            |
| 13              | 2025.832                | H9N2                     | M9                     |                            |
| 14              | 2187.806                | H10N2                    | M10                    |                            |

| Sf9 P15000 membranes |                         |                          |                        |                            |
|----------------------|-------------------------|--------------------------|------------------------|----------------------------|
| Fraction             | [M+Na] <sup>+</sup> m/z | Composition <sup>a</sup> | Structure <sup>b</sup> | Glycan scheme <sup>c</sup> |
| 1                    | 1053.576                | H3N2                     | M3                     |                            |
| 2                    | 1199.432                | H3N2F1                   | FM3                    |                            |
| 3                    | 1402.771                | H3N3F1                   | FA1                    |                            |
| 4                    | 1605.744                | H3N4F1                   | FA2                    |                            |
| 5                    | 1377.322                | H5N2                     | M5                     |                            |
| 6                    | 1767.415                | H4N4F1                   | FA2G1                  |                            |
| 7                    | 1539.293                | H6N2                     | M6                     |                            |
| 8                    | 1685.437                | H6N2F1                   | M6+F                   |                            |
| 9                    | 1685.865                | H6N2F1                   | M6+F                   |                            |
| 10                   | 1701.640                | H7N2                     | M7                     |                            |
| 11                   | 1863.296                | H8N2                     | M8                     |                            |
| 12                   | 1863.326                | H8N2                     | M8                     |                            |
| 13                   | 1863.672                | H8N2                     | M8                     |                            |

|    |          |       |     |                                                                                       |
|----|----------|-------|-----|---------------------------------------------------------------------------------------|
| 14 | 2025.556 | H9N2  | M9  | 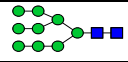    |
| 15 | 2025.779 | H9N2  | M9  |     |
| 16 | 2187.810 | H10N2 | M10 |     |
| 17 | 2349.642 | H11N2 | M11 | 2x  |
| 18 | 2511.432 | H12N2 | M12 | 3x  |

| Sf9 P100000 membrane |                         |                          |                        |                                                                                         |
|----------------------|-------------------------|--------------------------|------------------------|-----------------------------------------------------------------------------------------|
| Fraction             | [M+Na] <sup>+</sup> m/z | Composition <sup>a</sup> | Structure <sup>b</sup> | Glycan scheme <sup>c</sup>                                                              |
| 1                    | 1053.579                | H3N2                     | M3                     |       |
| 2                    | 1199.385                | H3N2F1                   | FM3                    |       |
| 3                    | 1402.571                | H3N3F1                   | FA1                    |       |
| 4                    | 1605.529                | H3N4F1                   | FA2                    |       |
| 5                    | 1377.679                | H5N2                     | M5                     |       |
| 6                    | 1767.861                | H4N4F1                   | FA2G1                  |       |
| 7                    | 1539.629                | H6N2                     | M6                     |      |
| 8                    | 1685.726                | H6N2F1                   | M6+F                   |     |
| 9                    | 1685.930                | H6N2F1                   | M6+F                   |     |
| 10                   | 1701.603                | H7N2                     | M7                     |     |
| 11                   | 1863.790                | H8N2                     | M8                     |     |
| 12                   | 1863.835                | H8N2                     | M8                     |     |
| 13                   | 1863.777                | H8N2                     | M8                     |     |
| 14                   | 2025.732                | H9N2                     | M9                     |     |
| 15                   | 2025.752                | H9N2                     | M9                     |     |
| 16                   | 2187.482                | H10N2                    | M10                    |     |
| 17                   | 2349.863                | H11N2                    | M11                    | 2x  |
| 18                   | 2512.015                | H12N2                    | M12                    | 3x  |

| Pichia pastoris A2A protein |                         |                          |                        |                                                                                      |
|-----------------------------|-------------------------|--------------------------|------------------------|--------------------------------------------------------------------------------------|
| Fraction                    | [M+Na] <sup>+</sup> m/z | Composition <sup>a</sup> | Structure <sup>b</sup> | Glycan scheme <sup>c</sup>                                                           |
| 1                           | 1701.658                | H7N2                     | M7                     | 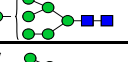 |
| 2                           | 1863.585                | H8N2                     | M8                     |  |
| 3                           | 2025.679                | H9N2                     | M9                     |  |
| 4                           | 2187.596                | H10N2                    | M10                    |  |

|   |          |       |     |    |
|---|----------|-------|-----|----|
| 5 | 2187.672 | H10N2 | M10 |    |
| 6 | 2349.892 | H11N2 | M11 | 2X |
| 7 | 2511.736 | H12N2 | M12 | 3X |
| 8 | 2673.493 | H13N2 | M13 | 4X |

| Pichia pastoris P15000 membranes |                         |                          |                        |                            |
|----------------------------------|-------------------------|--------------------------|------------------------|----------------------------|
| Fraction                         | [M+Na] <sup>+</sup> m/z | Composition <sup>a</sup> | Structure <sup>b</sup> | Glycan scheme <sup>c</sup> |
| 1                                | 1701.580                | H7N2                     | M7                     |                            |
| 2                                | 1863.451                | H8N2                     | M8                     |                            |
| 3                                | 2025.631                | H9N2                     | M9                     |                            |
| 4                                | 2187.517                | H10N2                    | M10                    |                            |
| 5                                | 2187.452                | H10N2                    | M10                    |                            |
| 6                                | 2349.596                | H11N2                    | M11                    | 2X                         |
| 7                                | 2511.356                | H12N2                    | M12                    | 3X                         |
| 8                                | n.d.                    | H13N2                    | M13                    | 4X                         |
| 9                                | 2835.192                | H14N2                    | M14                    | 5X                         |

| Pichia pastoris P100000 membrane |                         |                          |                        |                            |
|----------------------------------|-------------------------|--------------------------|------------------------|----------------------------|
| Fraction                         | [M+Na] <sup>+</sup> m/z | Composition <sup>a</sup> | Structure <sup>b</sup> | Glycan scheme <sup>c</sup> |
| 1                                | 1701.614                | H7N2                     | M7                     |                            |
| 2                                | 1863.592                | H8N2                     | M8                     |                            |
| 3                                | 2025.587                | H9N2                     | M9                     |                            |
| 4                                | 2187.386                | H10N2                    | M10                    |                            |
| 5                                | 2187.475                | H10N2                    | M10                    |                            |
| 6                                | 2349.459                | H11N2                    | M11                    | 2X                         |
| 7                                | 2511.469                | H12N2                    | M12                    | 3X                         |
| 8                                | 2673.280                | H13N2                    | M13                    | 4X                         |
| 9                                | 2835.600                | H14N2                    | M14                    | 5X                         |

<sup>a</sup> H=hexose, N = N-acetylhexosamine, F = deoxyhexose (fucose)

<sup>b</sup> Abbreviations used: all N-glycans have a core sugar sequence consisting of two N-acetylglucosamines (GlcNAc) and three mannose residues; F at the start of abbreviation indicates a core fucose  $\alpha$ 1-6 linked to the inner GlcNAc; Mx, number (x) of mannoses on core GlcNAc; Ax, number (x) of antennae (GlcNAc) on trimannosyl core; Fx, number (x) of fucose linked  $\alpha$ 1-3 to antenna GlcNAc; Gx, number (x) of  $\beta$ 1-4 linked galactoses on antenna.

<sup>c</sup> Symbols used: blue square = N-acetylglucosamine, green circle = mannose,  
red triangle = fucose, yellow circle = galactose



Figure S3

A

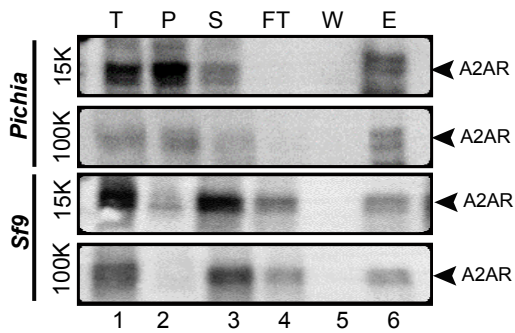

B

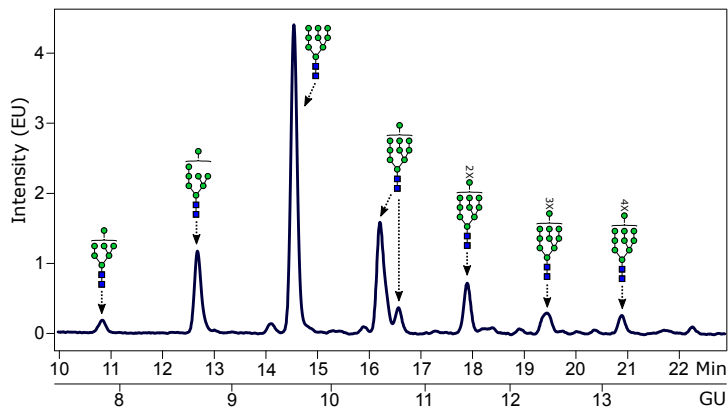

C

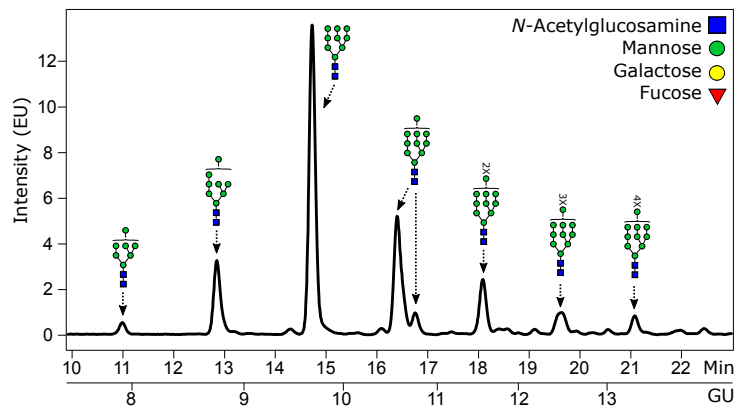

D

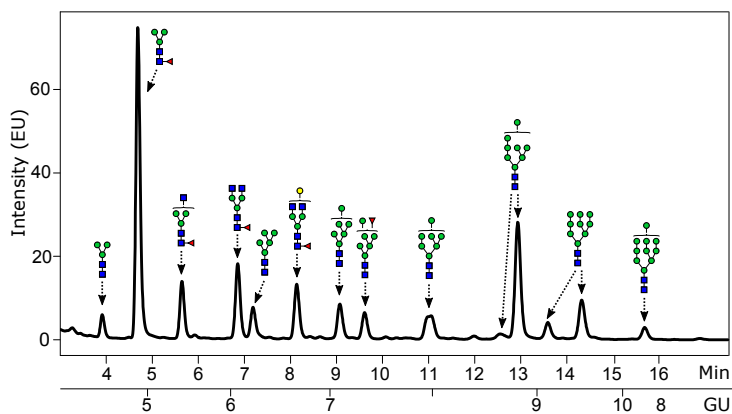

E

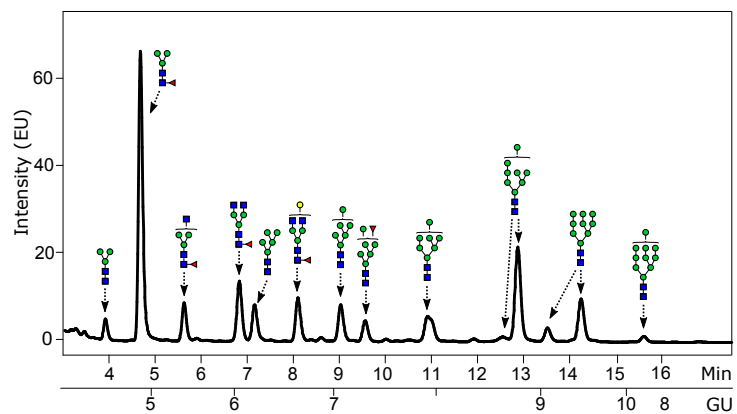

## Figure S4

### Fragments hits on A2AR using STD-NMR

Strong fragments hits selected for biological assay

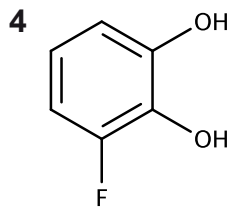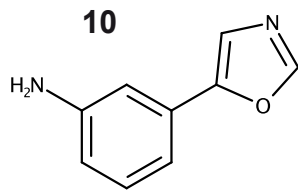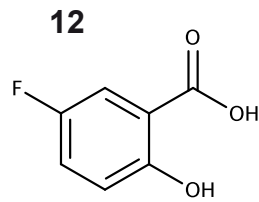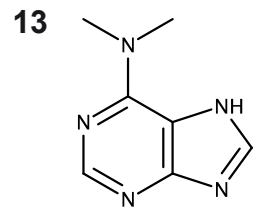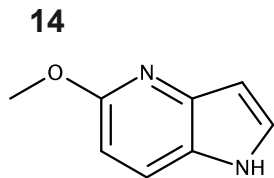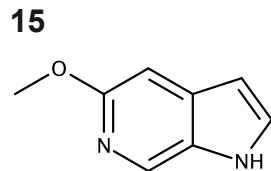

Others strong fragments hits from the screening

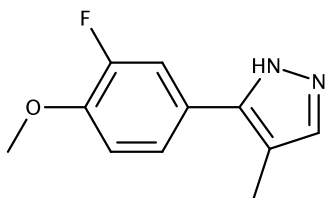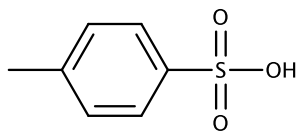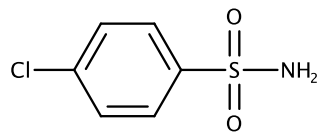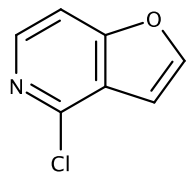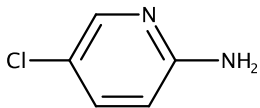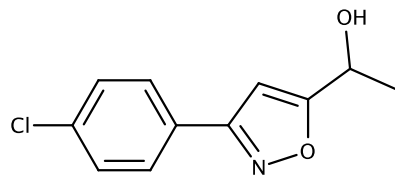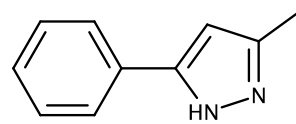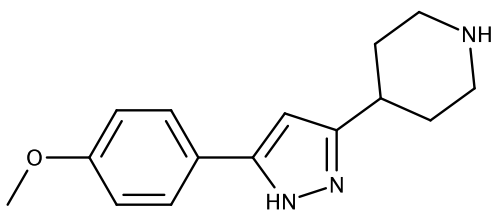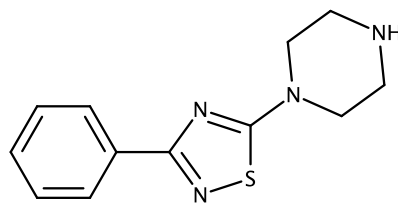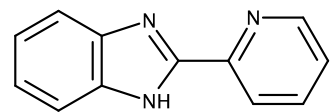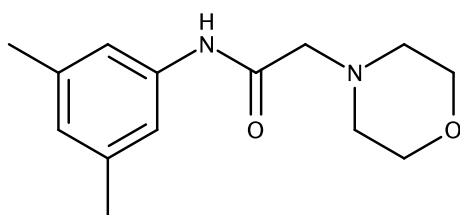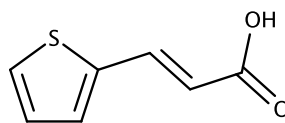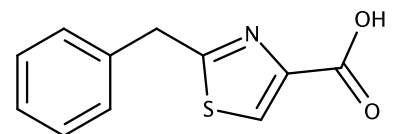

Figure S5

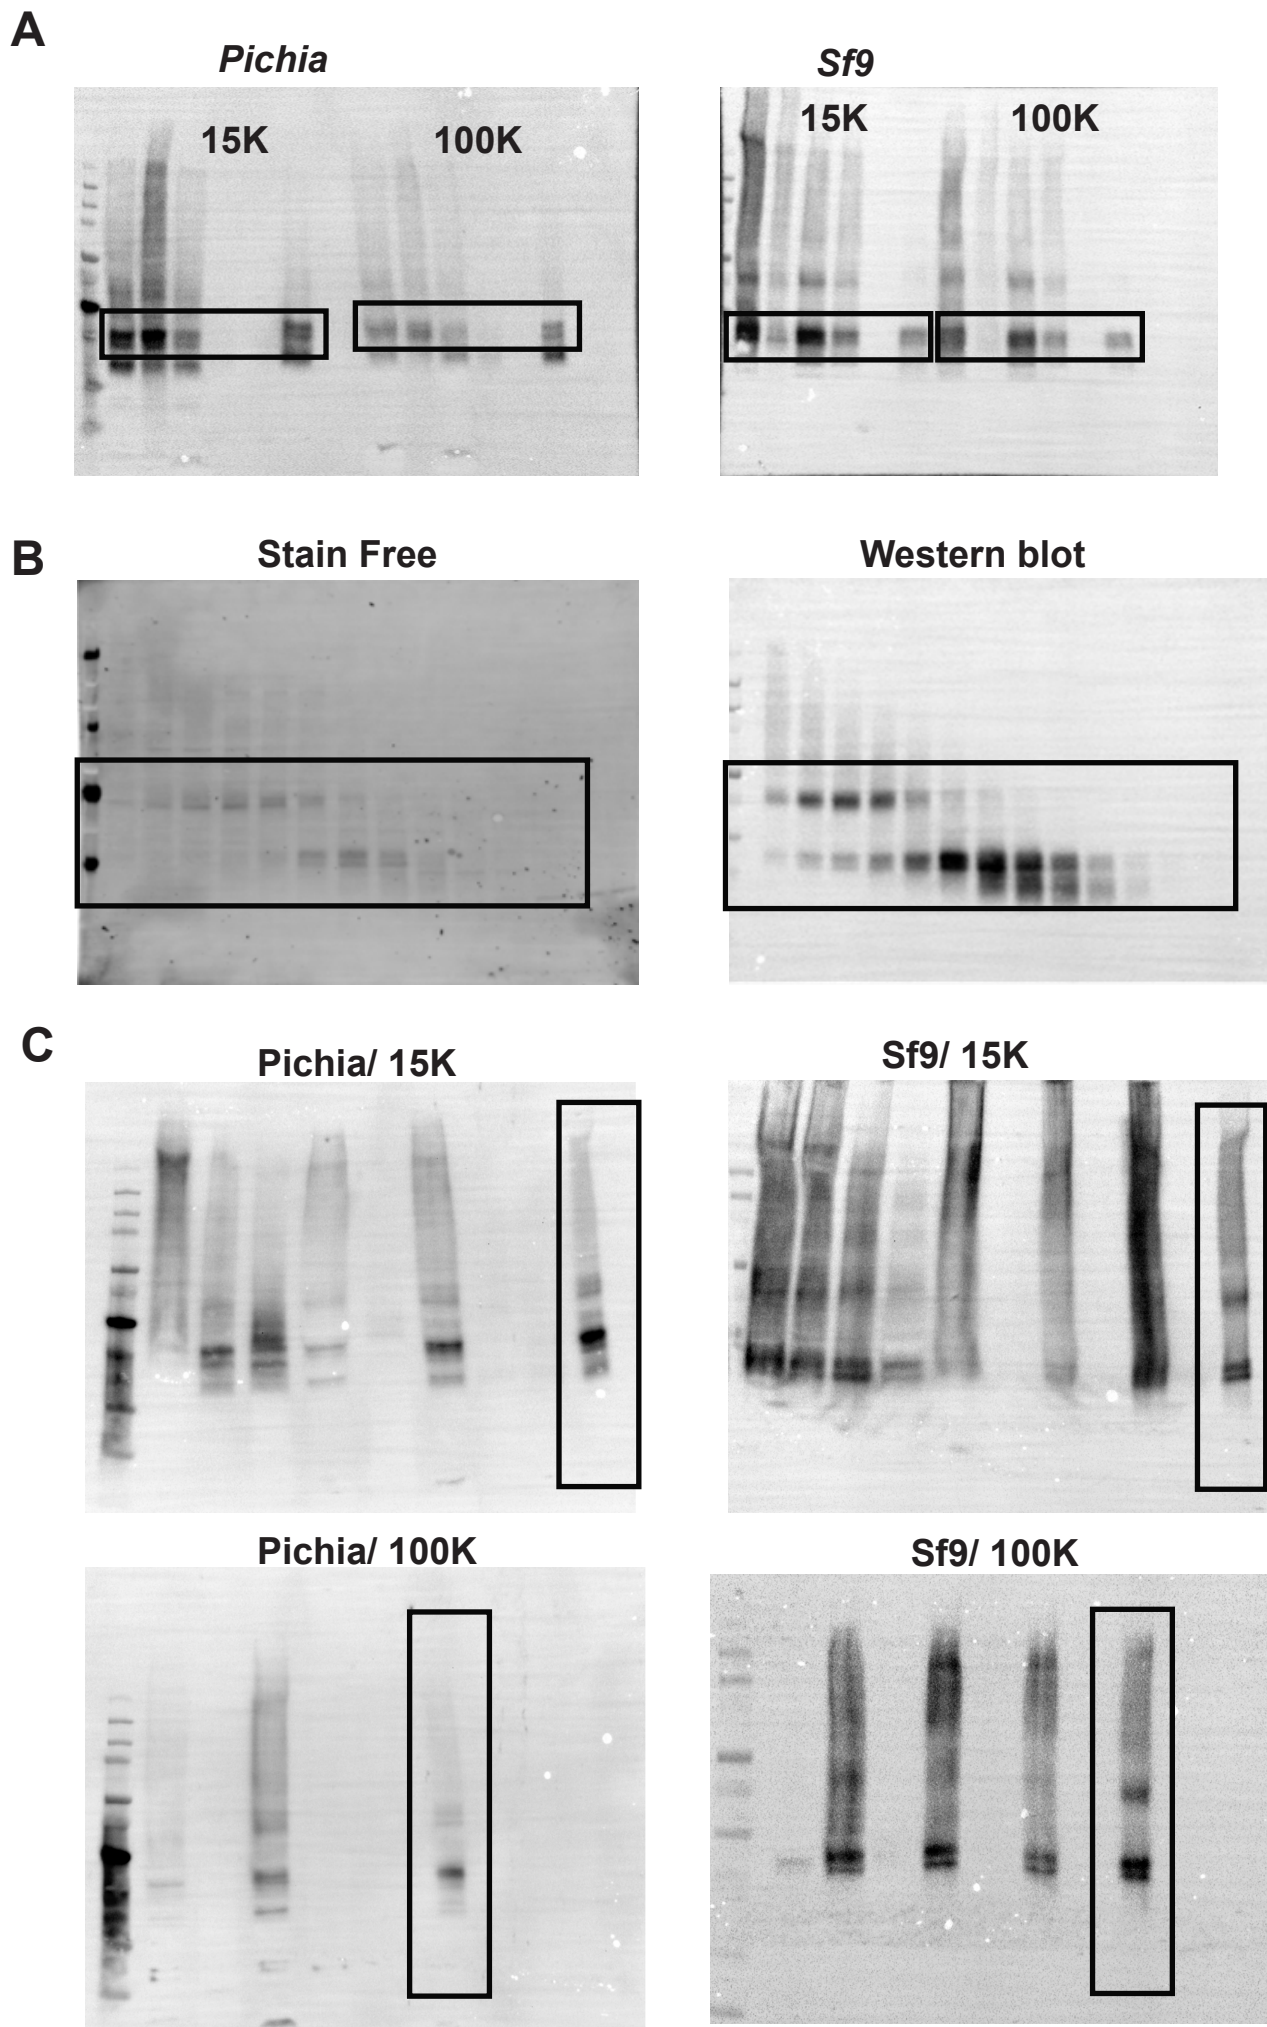

**Figure S6**

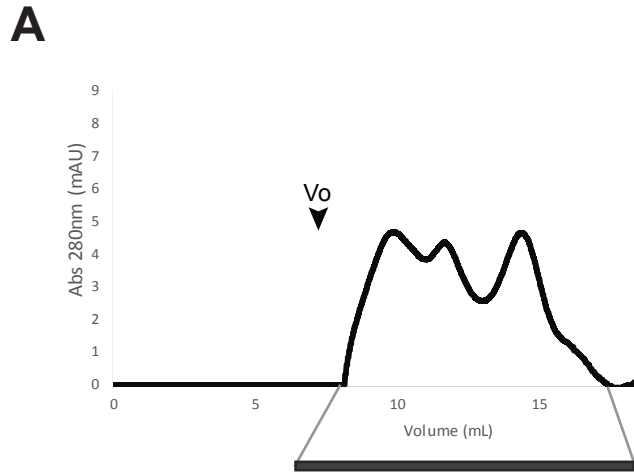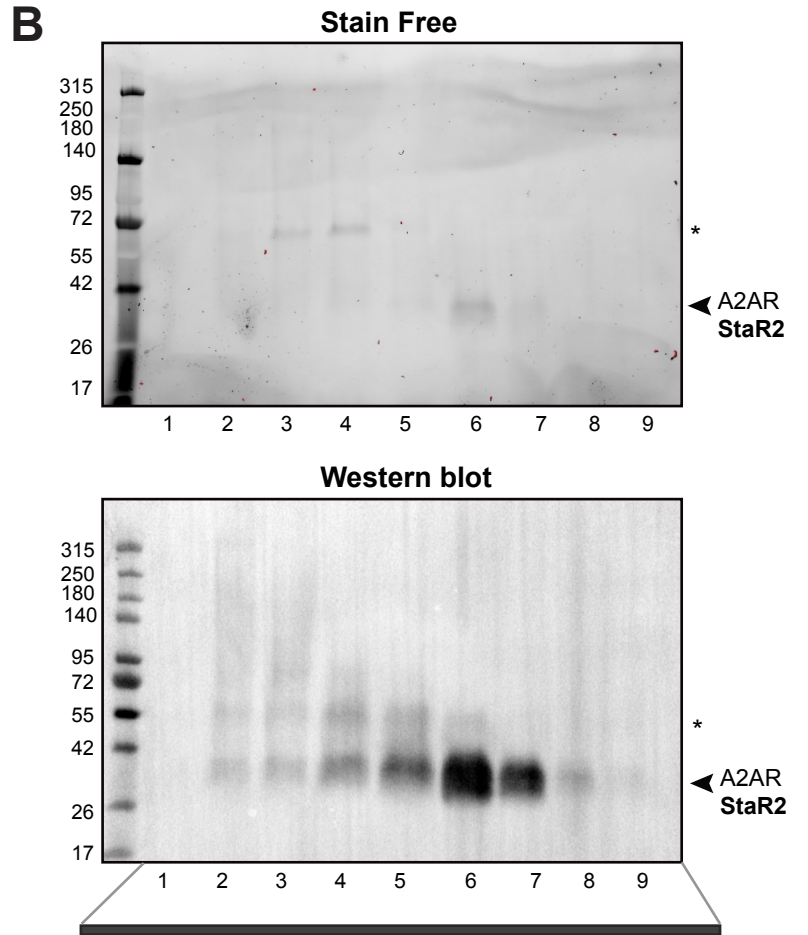

## Figure S7

### Strong NMR-STD binders

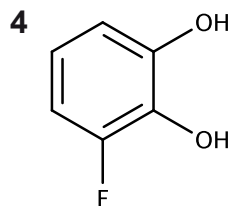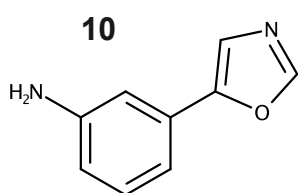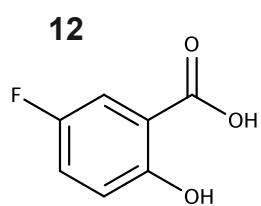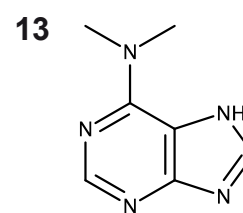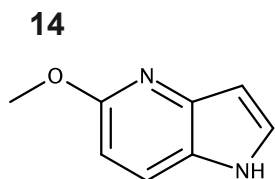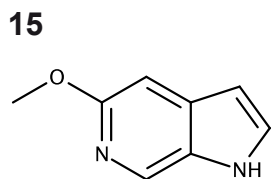

### Weak NMR-STD binders

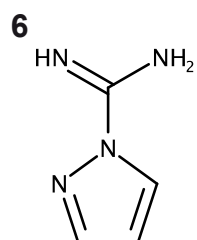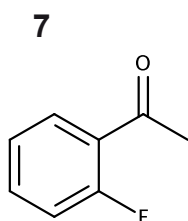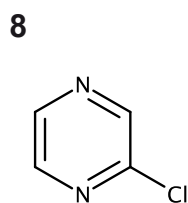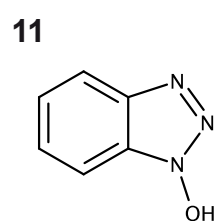

### Non NMR-STD binders

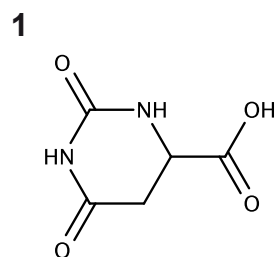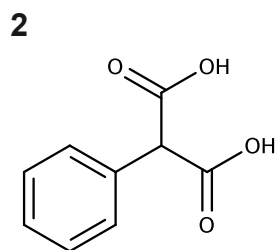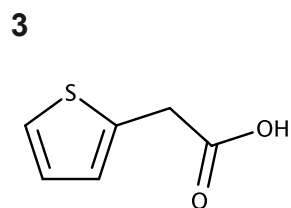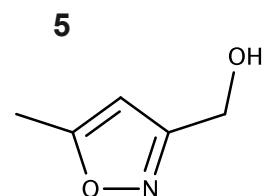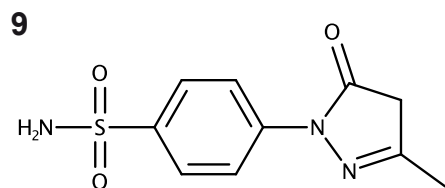

**Figure S8**

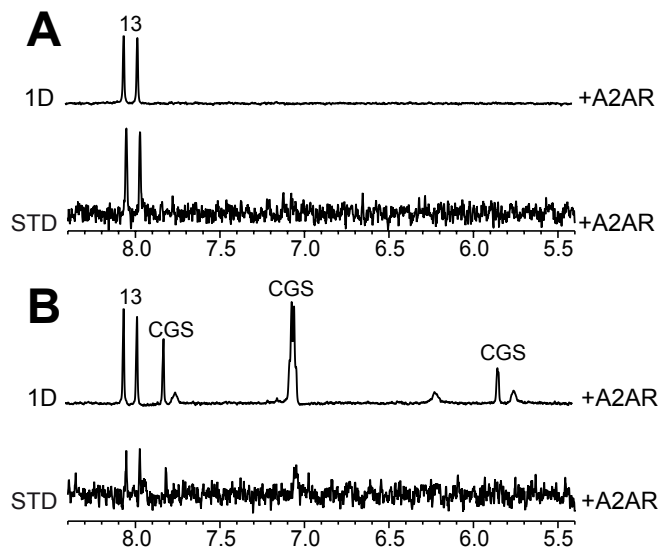

| Samples (radioligand)                                                         | Kd ( $\mu\text{M}$ )           |
|-------------------------------------------------------------------------------|--------------------------------|
| <i>P. pastoris</i> plasma A2A membranes (CGS 21680)                           | $0.805 \pm 0.262 \mu\text{M}$  |
| <i>P. pastoris</i> internal A2A membranes (CGS 21680)                         | $0.307 \pm 0.134 \mu\text{M}$  |
| <i>Sf9</i> plasma A2A membranes (CGS 21680)                                   | $0.293 \pm 0.06 \mu\text{M}$   |
| <i>Sf9</i> internal A2A membranes (CGS 21680)                                 | $0.113 \pm 0.055 \mu\text{M}$  |
| IMAC-purified A2A protein from DDM/CHS condition (CGS 21680)                  | $0.444 \pm 0.036 \mu\text{M}$  |
| IMAC-purified A2A protein from DDM/CHS/ CALX-R10 condition (CGS 21680)        | $0.5 \pm 0.036 \mu\text{M}$    |
| IMAC-purified A2A protein DDM/CHS/CALX-R10 condition (ZM241385)               | $3.577 \pm 1.116 \text{ nM}$   |
| SEC-purified A2A protein Pool n°2 from DDM/CHS/CALX-R10 condition (CGS 21680) | $0.1755 \pm 0.041 \mu\text{M}$ |
| SEC-purified A2A protein Pool n°1 DDM/CHS/CALX-R10 condition (CGS 21680)      | no binding detected            |

**Table S9:** Dissociation constant determined by radiobinding measurements for studied A2A samples.
